# Supplementary material
Source: PubMed Central journal article supplement (PMC5934771)
Supplement: EMBR-19-e45144-s001.pdf [file EMBR-19-e45144-s001.pdf]

## Expanded View Figures

**Figure EV1. CIP2A is involved in ciliogenesis under the physiological conditions.**

A, B Immunofluorescence images of endogenous CIP2A and TMEM67 in RPE1 cells. Cells under following conditions, asynchronized (AS), serum-starved for 48 h (S.S. 48 h), serum re-stimulation for 1 h after S.S. 48 h (S. 1 h), serum re-stimulation for 5 h after S.S. 48 h (S. 5 h) were fixed with methanol and stained with antibodies specific for CIP2A (red), TMEM67 (green) and DNA was stained with DAPI (blue). Shown are the maximum projections from z stacks; scale bar = 20  $\mu\text{m}$  (A) or 5  $\mu\text{m}$  (B).

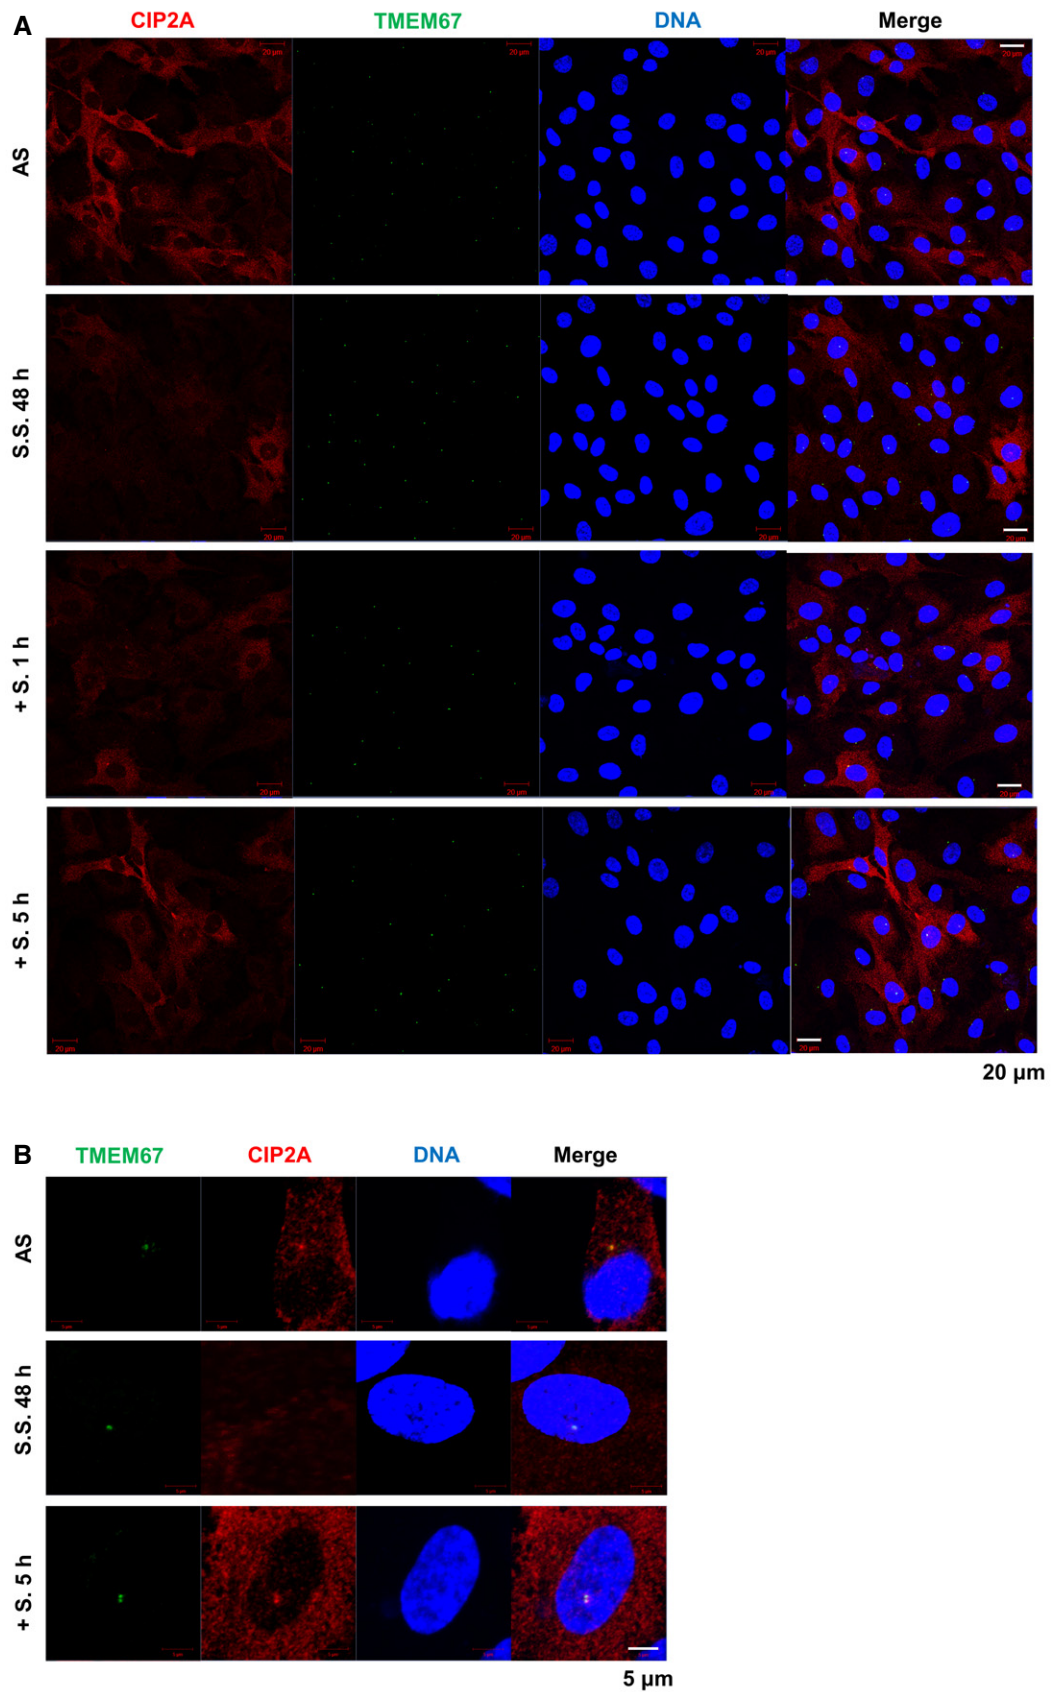

Figure EV1.

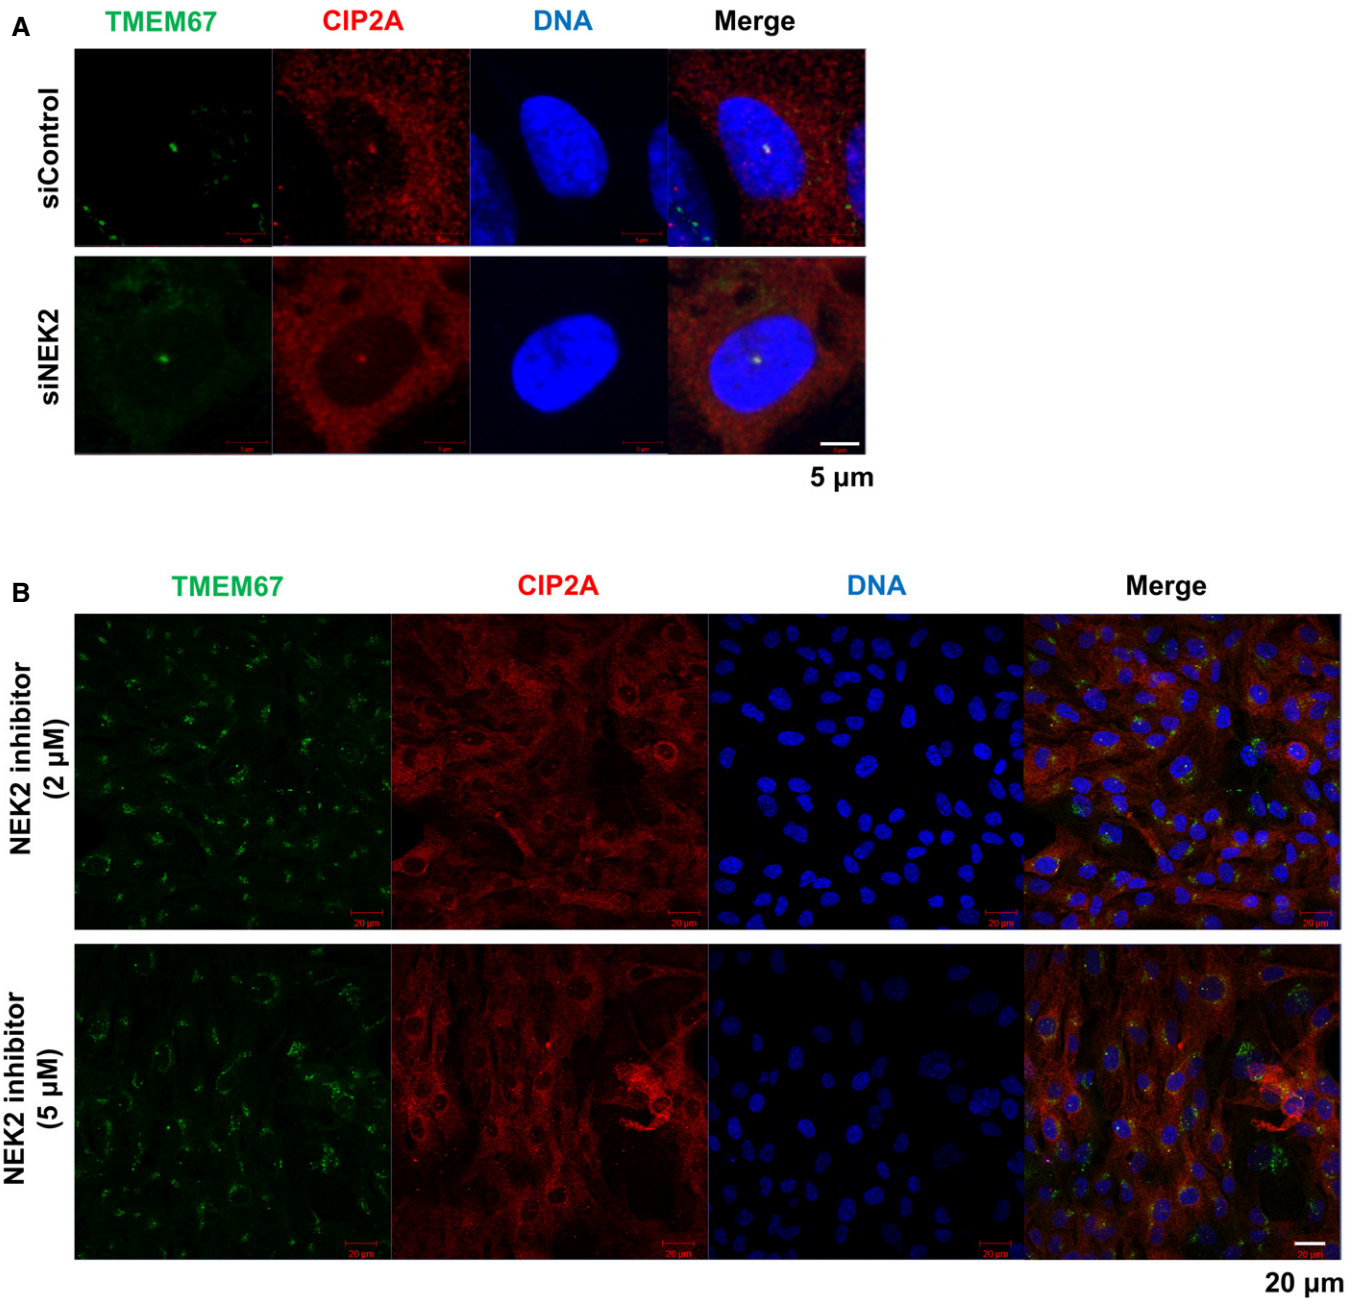

**Figure EV2. CIP2A localization is NEK2 independent.**

Immunofluorescence images of endogenous CIP2A and TMEM67 in RPE1 cells.

A Cells were transfected with control or NEK2 siRNAs for 48 h, and then fixed for staining and imaging. Shown are the maximum projections from z stacks; scale bar = 5  $\mu$ m.

B Cells were treated with the NEK2 inhibitor Rac-CCT 250863 for 24 h and then fixed for staining and imaging. Shown are the maximum projections from z stacks; scale bar = 20  $\mu$ m.
